# Supplementary material
Source: publisher figshare collection journal article supplement (https://frontiersin.figshare.com/ndownloader/files/13724657)

**A**Triticale *Ph1+*Triticale *Ph1-*

20 cm

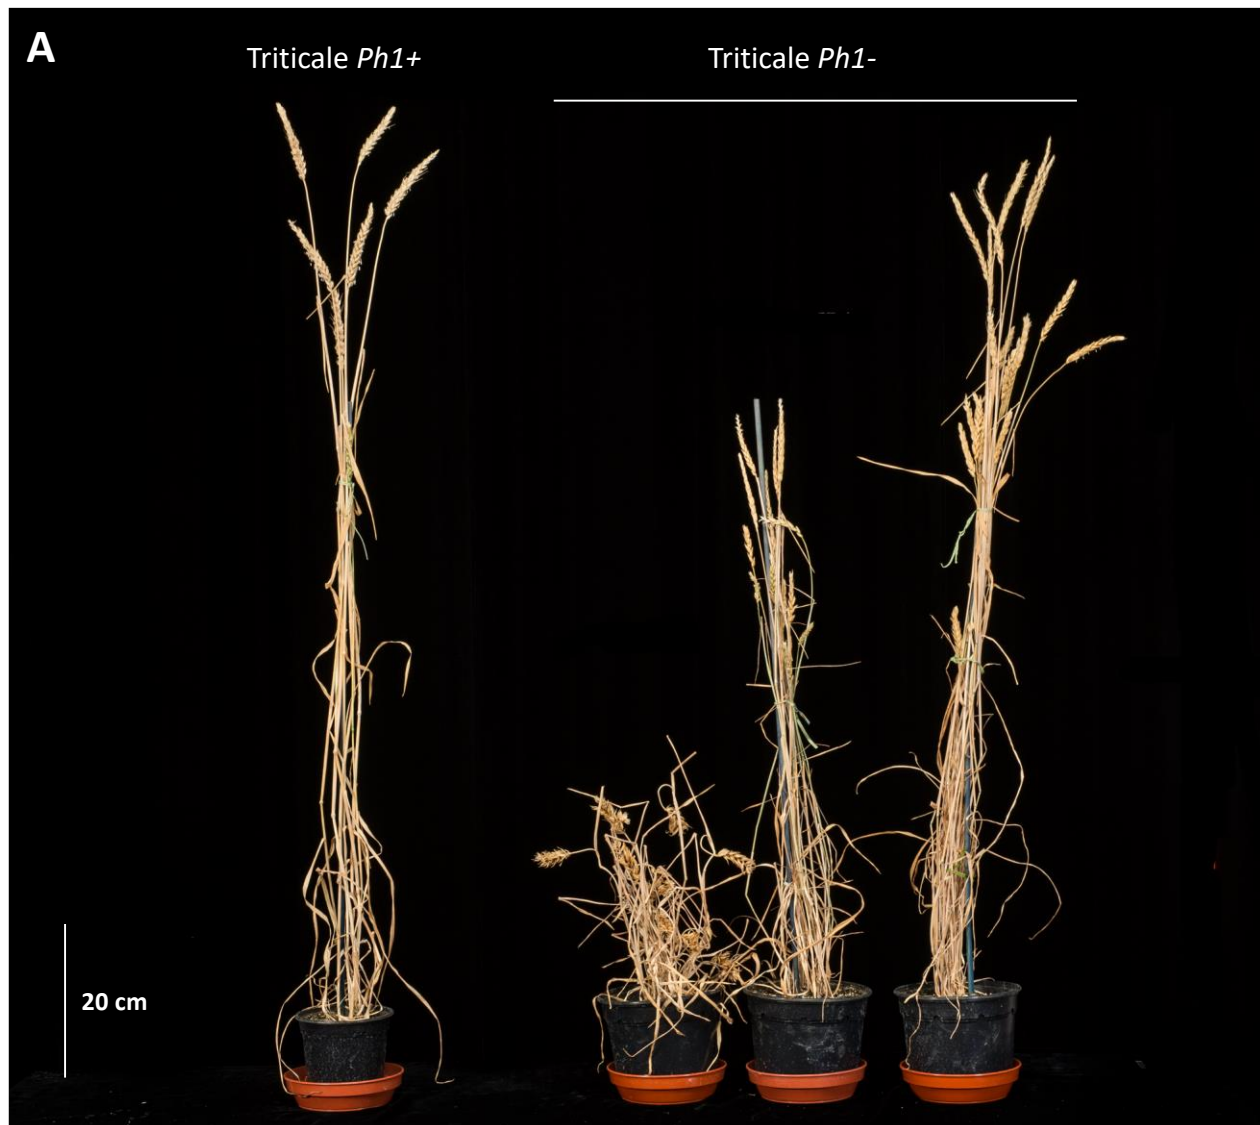**B**Triticale *Ph1+*Triticale *Ph1-*

5 cm

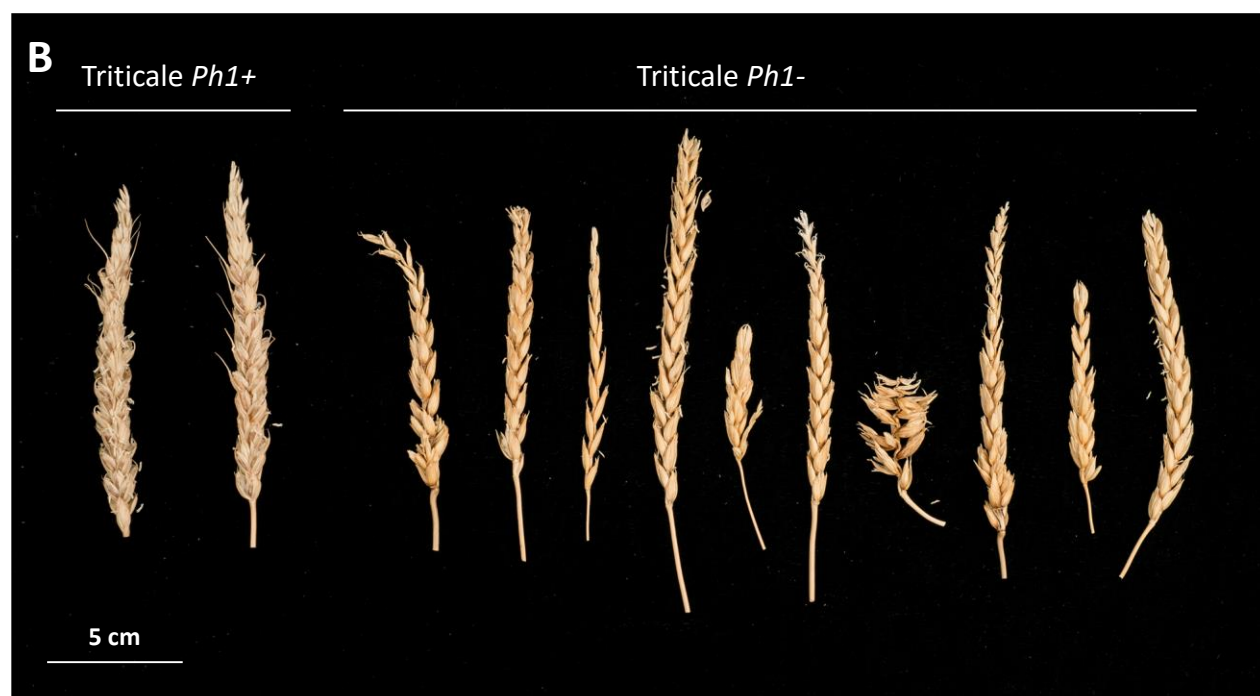

Supplement: Supplementary file [file 13724657]
